# Supplementary material
Source: publisher figshare collection journal article supplement (https://gsapubs.figshare.com/ndownloader/files/36561330)
Supplement: Supplementary file 1 [file 36561330]

## Sheet: Table S5
Table S5 LA-ICP-MS U-Pb analytical results of columbites and apatites
Spot	238U/206Pb	2σ	207Pb/206Pb	2σ	rho	comments
KH-C-1	35.933	1.51691	0.0701223	0.00439829	0.532259	Columbite
KH-C-2	30.5313	1.44591	0.0622332	0.002415	0.7476	Columbite
KH-C-3	30.9569	1.6842	0.129448	0.00693028	0.682705	Columbite
KH-C-4	20.7	1.32852	0.311464	0.0207469	0.661907	Columbite
KH-C-5	33.6524	1.36163	0.0551765	0.0022828	0.667385	Columbite
KH-C-6	32.7032	1.19942	0.0534357	0.00116313	0.836197	Columbite
KH-C-7	33.485	1.36203	0.0634777	0.00326303	0.588783	Columbite
KH-C-8	21.3903	1.84121	0.251949	0.0265633	0.601385	Columbite
KH-C-9	9.72014	0.404313	0.454537	0.00703048	0.911851	Columbite
KH-C-10	34.8435	1.73972	0.0641117	0.00357567	0.638278	Columbite
KH-C-11	36.4333	1.42515	0.0513852	0.0012614	0.827219	Columbite
KH-C-12	33.2138	1.39245	0.0635759	0.00325789	0.606125	Columbite
KH-C-13	35.1572	1.357	0.0622024	0.0026814	0.640954	Columbite
KH-C-14	32.9963	1.31064	0.0651048	0.00319037	0.60325	Columbite
KH-C-15	34.2009	1.86987	0.0876681	0.00717512	0.529219	Columbite
KH-C-16	36.2233	1.57103	0.0601979	0.00286746	0.647928	Columbite
KH-C-17	18.9814	1.23746	0.276527	0.0189157	0.666861	Columbite
KH-C-18	32.8829	1.36229	0.0586095	0.00381596	0.515409	Columbite
KH-C-19	15.8961	1.13036	0.316738	0.0157961	0.802821	Columbite
KH-A-1	5.40013	0.168177	0.705315	0.0102347	#N/A	Apatite
KH-A-2	5.27178	0.169	0.727131	0.0107468	#N/A	Apatite
KH-A-3	5.63674	0.180208	0.719847	0.0084586	#N/A	Apatite
KH-A-4	2.96836	0.113119	0.771469	0.0088515	1.02469	Apatite
KH-A-5	7.6334	0.255012	0.681662	0.00709436	0.822265	Apatite
KH-A-6	7.27748	0.239732	0.661898	0.00753072	0.513351	Apatite
KH-A-7	3.86459	0.122709	0.735484	0.0092982	1.0428	Apatite
KH-A-8	5.16158	0.17296	0.713224	0.00871463	1.03602	Apatite
KH-A-9	4.44226	0.169528	0.737949	0.0099131	1.0336	Apatite
KH-A-10	5.91444	0.187617	0.686855	0.00863542	1.04242	Apatite
KH-A-11	3.83325	0.124597	0.747253	0.00977719	1.04373	Apatite
KH-A-12	6.89829	0.408494	0.6959	0.00873374	0.178813	Apatite
KH-A-13	5.81865	0.17968	0.696068	0.00632343	0.145307	Apatite
KH-A-14	3.83863	0.123688	0.74337	0.00825033	1.0322	Apatite
KH-A-15	5.74923	0.180295	0.693431	0.00855532	0.877752	Apatite
KH-A-16	4.76842	0.180739	0.717205	0.00705496	0.932925	Apatite
KH-A-17	3.98095	0.125356	0.743759	0.00711993	0.906046	Apatite
KH-A-18	6.22979	0.206208	0.67378	0.0060449	0.919449	Apatite
KH-A-19	3.395	0.147313	0.763348	0.00954098	0.933713	Apatite
KH-A-20	4.14994	0.145164	0.73502	0.00940701	0.896609	Apatite
KH-A-21	5.9214	0.19419	0.695812	0.00814202	1.03451	Apatite
KH-A-22	6.3347	0.207883	0.683604	0.00899949	1.04344	Apatite
KH-A-23	6.17334	0.191119	0.678232	0.00828714	1.04207	Apatite
KH-A-24	8.91434	0.281171	0.633313	0.00568509	1.02209	Apatite
KH-A-25	5.35869	0.170537	0.70264	0.00720143	0.907326	Apatite
KH-A-26	6.46872	0.210197	0.67977	0.00795084	0.643928	Apatite
KH-A-27	2.65504	0.144325	0.766733	0.0139964	0.469278	Apatite
KH-A-28	6.69433	0.206751	0.676159	0.0083706	0.453433	Apatite
KH-A-29	5.95418	0.194768	0.701809	0.00768327	0.166414	Apatite
KH-A-30	5.79338	0.181223	0.712609	0.0115156	0.830067	Apatite
